# Supplementary material for: Picosecond Pulsed Laser Deposition of Metals and Metal Oxides
Source: MDPI journal article supplement (doi:10.3390/ma16196364), 2023-09-22
Supplement: s1 [file s1]

# Picosecond Pulsed Laser Deposition of Metals and Metal Oxides

Anna Dikovska, Genoveva Atanasova, Tina Dilova, Aleksandra Baeva, Georgi Avdeev, Petar Atanasov and Nikolay Nedyalkov

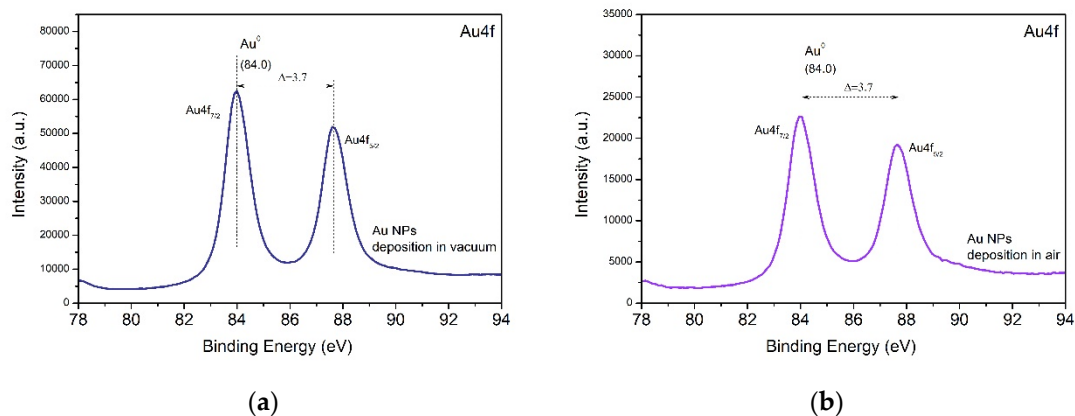

**Figure S1.** XPS spectra of the Au samples deposited (a) in vacuum and (b) in air.

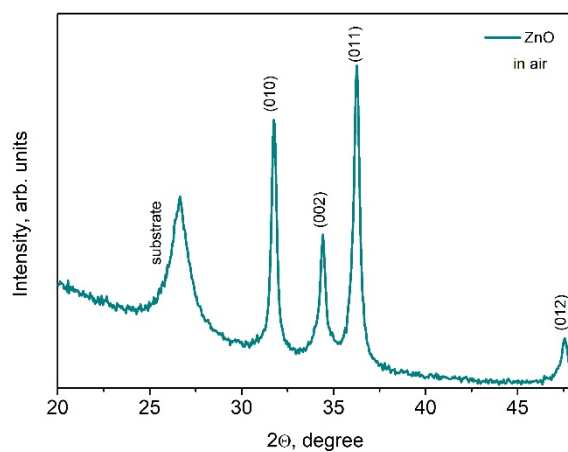

**Figure S2.** XRD patterns of material ablated from ZnO target in air.

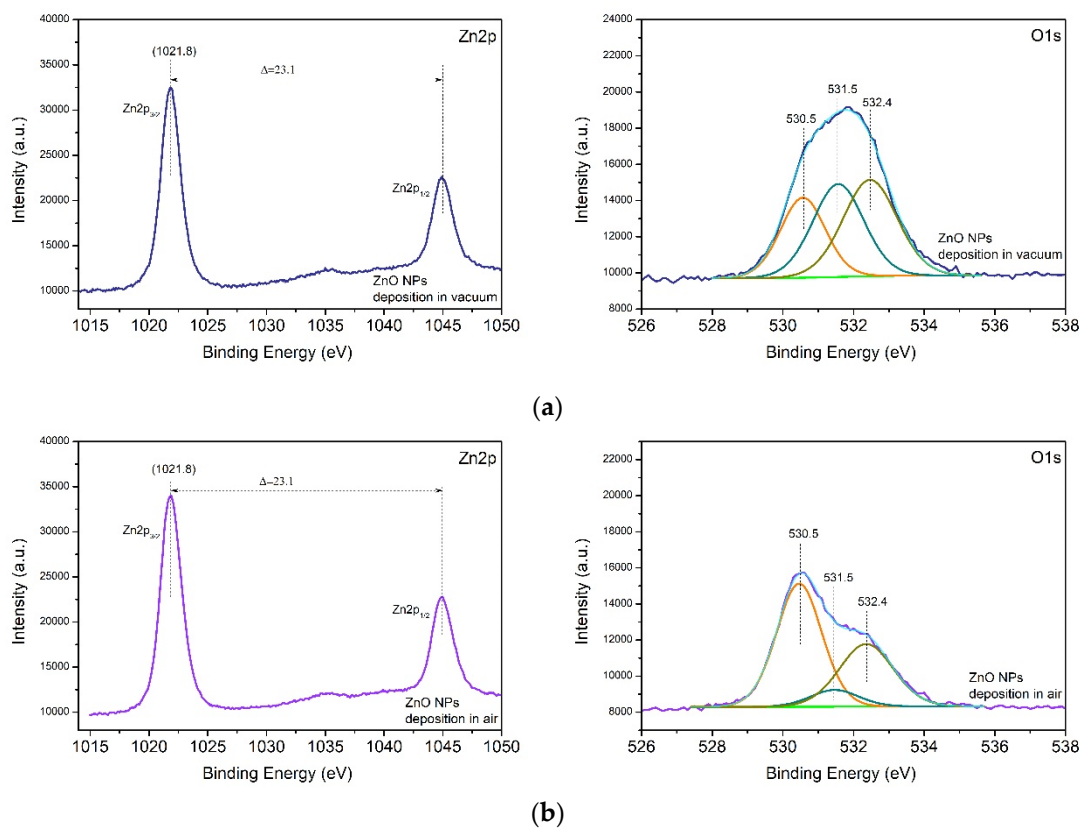

**Figure S3.** XPS spectra of the ZnO samples deposited (a) in vacuum and (b) in air.

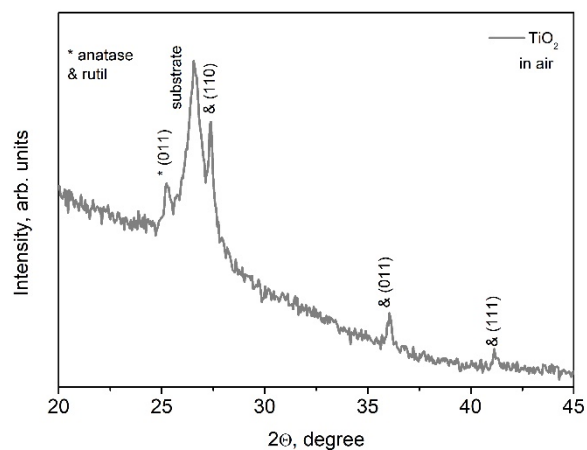

**Figure S4.** XRD patterns of material ablated from TiO<sub>2</sub> target in air.
